# Supplementary material for: Electrically controlled rapid release of actives encapsulated in double-emulsion droplets
Source: Royal Society of Chemistry journal article supplement (doi:10.1039/c7lc01387f), 2018-01-01
Supplement: c7lc01387f5.pdf [file c7lc01387f5.pdf]

## Supporting Information

### Electrically Controlled Rapid Release of Actives Encapsulated in Double-emulsion Droplets

*Yankai Jia, Yukun Ren\*, Likai Hou, Weiyu Liu, Tianyi Jiang, Xiaokang Deng, Ye Tao, Hongyuan Jiang\**

#### Supporting Figures

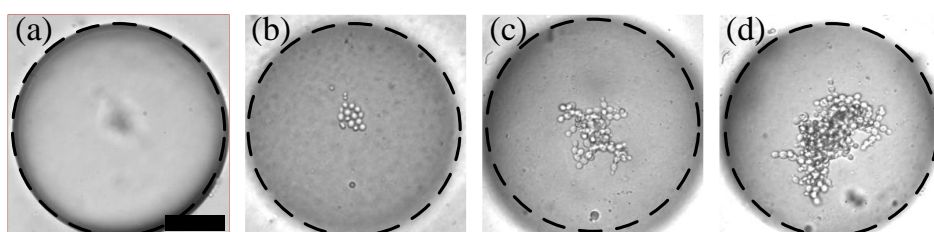

Figure S1 Proliferation of yeast cell in double-emulsion droplets. (a) Outline of the droplet. The yeast cells are out of focus, scale bar 50  $\mu\text{m}$ ; (b) Yeast cells inside the droplet upon encapsulation; (c) 3 hours after the encapsulation of the yeast cells; (d) 6 hours after the encapsulation of the yeast cells.

#### Movie Description

##### Supplementary Movie 1

Release of reagent by single-core droplet. The diameter of the droplet is 260  $\mu\text{m}$ . The core of the droplet is of potassium chloride solution with a conductivity of 40 mS/m (supplemented with 0.5 % PVA). The suspending medium is 0.5% aqueous solution (with a conductivity of 8 mS/m). The voltage of the applied electric signal is 30 V with a frequency of 50 KHz. Methylene blue is added in the core as a dye for better visualization. The video is in real time.

##### Supplementary Movie 2

Release of reagents by double-core droplet. The droplet adopts an ellipse shape with major axis of 350  $\mu\text{m}$  and minor axis of 330  $\mu\text{m}$ . The cores of the droplet are of potassium chloride solution with a conductivity of 40 mS/m (supplemented with 0.5 % PVA). The suspending medium is 0.5%

---

aqueous solution (with a conductivity of 8 mS/m). The voltage of the applied electric signal is 25 V with a frequency of 10 KHz. Methylene blue is added in one of the cores as a dye to one of the two cores for better visualization. The video is in real time.

#### Supplementary Movie 3

Release of fluorescent nanoparticles by single-core droplet. The diameter of the polystyrene is 500 nm. The core of the droplet is of potassium chloride solution with a conductivity of 40 mS/m (supplemented with 0.5 % PVA). The suspending medium is 0.5% aqueous solution (with a conductivity of 8 mS/m). The voltage of the applied electric signal is 30 V with a frequency of 50 KHz. The video is in real time.

#### Supplementary Movie 4

Release of fluorescent nanoparticles by double-core droplet. The diameter of the polystyrene is 500 nm. The cores of the droplet are of potassium chloride solution with a conductivity of 40 mS/m (supplemented with 0.5 % PVA). The suspending medium is 0.5% aqueous solution (with a conductivity of 8 mS/m). The voltage of the applied electric signal is 25 V with a frequency of 10 KHz. The video is in real time.
